# Supplementary material for: Intelectin 1 suppresses the growth, invasion and metastasis of neuroblastoma cells through up-regulation of N-myc downstream regulated gene 2
Source: PubMed Central journal article supplement (PMC4359454; doi:10.1186/s12943-015-0320-6), 2015-02-21

# Supplementary Figure S3

**A**

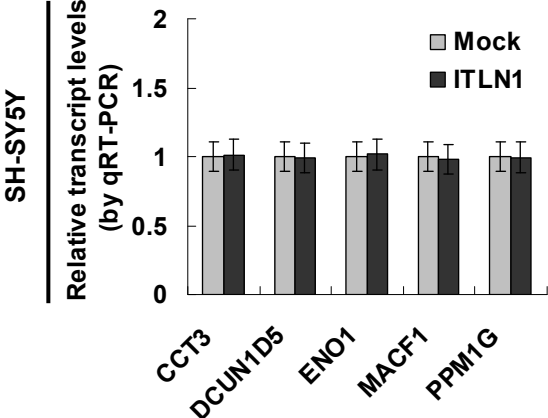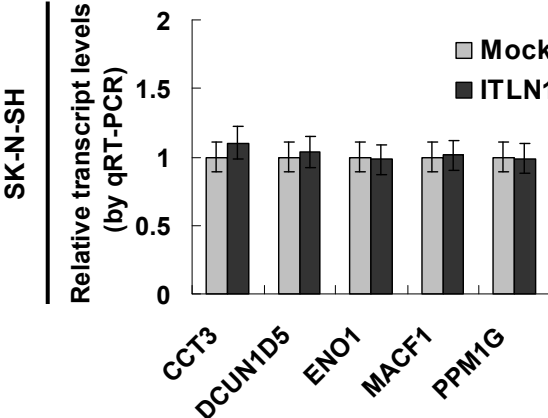

**B**

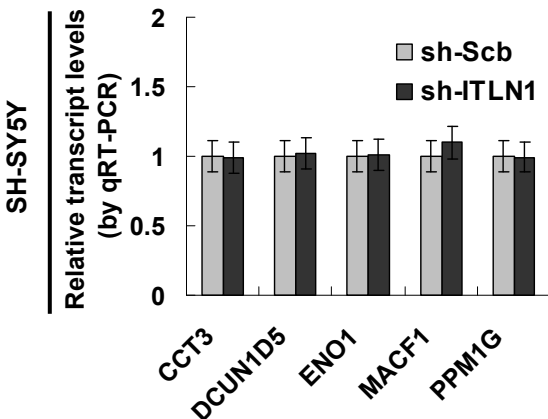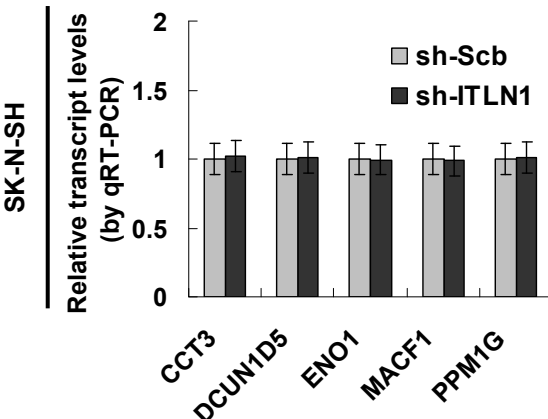

Supplement: 12943_2015_320_MOESM3_ESM.pdf [file 12943_2015_320_MOESM3_ESM.pdf]
